# Supplementary material for: Accuracy of an amplicon-sequencing nanopore approach to identify variants in tuberculosis drug-resistance-associated genes
Source: PubMed Central journal article supplement — Microb Genom. 2021 Dec 17;7(12):000740. doi: 10.1099/mgen.0.000740 (PMC8767343; doi:10.1099/mgen.0.000740), 2021-12-17
Supplement: mgen-7-0740-s001.pdf [file mgen-7-0740-s001.pdf]

# SUPPLEMENTARY MATERIAL

## Accuracy of an Amplicon Sequencing Nanopore Approach to Identify Variants in Tuberculosis Drug Resistance-associated Genes

### Supplementary Methods

#### 1) Optimization of the single-tube multiplex PCR reaction

A qPCR of the PCR product was performed to set up the optimum concentration of each primer to obtain an equimolar amount of all the amplicons. The qPCR reaction volume was 20uL containing 1X volume Kapa SYBR Fast qPCR master mix (KAPA Biosystems, Roche), 0.2uM primers and 0.2ng of DNA (PCR amplicons). Water was added to reach the final volume. For this test, reverse primers were designed to amplify a small region of each gene (150-200bp) checking the specificity to avoid non-specific interactions (See **Table S6** containing the list of the qPCR primer sequences).

#### 2) Barcodes design

We designed a set of 20 different barcodes, maximizing the genetic distance between them and supporting the correction of insertions, deletions and substitutions. We used the R package DNABarcodes to create barcodes of 36 bp using the Sequence-Levenshtein metric under the Ashlock heuristic. Each barcode consisted of a unique region of 20bp and two common regions of 8 bp (ACGATCTA) flanking this central sequence (See **Table S2** containing customized barcode sequences). Primers with the barcode sequences and their complementary strands were ordered from IDT with HPLC purification.

Barcodes were designed using a R package called DNABarcodes using the Sequence-Levenshtein metric under the Ashlock heuristic model (1):

```
mySeqlevSet <- create.dnabarcodes(10, metric="seqlev", euristic="ashlock")
```

This created 10 bp barcodes. We built our 20 bp barcodes by joining two different barcodes of 10 bp.

### 3) Enrichment PCR step for lower yield samples

An additional PCR step was performed after the ligation of barcodes, only in samples that didn't yield less than 500ng of gene product in the first PCR. The reaction mix was prepared in a final volume of 50uL containing 10uL HiFi GC buffer 5X, dNTPs 0.3mM each, 0.4U of Kapa HiFi HS polymerase (Kapa Biosystems®), 5uL of each forward barcode 10uM were added to its corresponding sample, 2ng of barcoded DNA and water until reaching the final volume. Thermocycling conditions consist on a denaturation step at 95°C during 3 minutes followed by 15 cycles of amplification as follows: 20 seconds at 98°C, 15 seconds at 65°C (primers annealing), 2 minutes at 72°C (primers extension) and 5 minutes at 72°C (final extension step). Final PCR enriched product was purified with 0.6X volume AMPure XP magnetic beads (following the Agencourt AMPure XP purification protocol) and eluted from the beads with Tris 10mM (pH=8.5) and quantified with Qubit®.

### 4) Modifications in the MinION library preparation protocol

Incubation time was increased from 10 to 30 minutes in the dA-tailing step, and also in the adapter ligation step to 30 minutes.

### 5) Base calling

We run guppy basecaller using 'flip flop' algorithm (2) by applying the following parameters:

```
guppy_basecaller --input_path $INPUT \  
  --save_path $OUTPUT\  
  --verbose_logs \  
  --cpu_threads_per_caller 1 \  
  --num_callers 20 \  
  --config dna_r9.4.1_450bps_flipflop.cfg
```

### 6) Demultiplexing

To demultiplex the multi-fastq obtained after performing the base calling we run porechop (<https://github.com/rswick/Porechop>):

```
python porechop-runner.py -i $FASTQ -b demultiplex/
```

This python script takes a multifasta file containing all the reads and classifies the reads depending on their barcode sequence generating a folder with separated fasta files, one per

sample. We modified the Oxford Nanopore barcode sequences by our customized barcode sequences. To demultiplex the reads, default parameters were used: --check-reads 10000, --adapter\_threshold 90, --scoring\_scheme (match = 3, mismatch = -6, gap open = -5, gap extend = -2), --end\_size 150, --min\_trim\_size 4, --ehd\_threshold 75, --extra\_end\_trim 2, --middle\_threshold 85, --min\_split\_read\_size 1000, --extra\_middle\_trim\_good\_side 10, --extra\_middle\_trim\_bad\_side 100.

## 7) Mapping

Mapping was done aligning reads to a multi fasta file containing the sequences of the genome regions included in the panel (extracted from the reference strain NC\_000962.3 (3)) using minimap2 (4) with the following parameters:

```
# Mapping reads to the reference
minimap2 -ax map-ont $REFERENCE $FASTQ -t20 > $SAM

# Filtering mapped reads by mapping quality
awk '$1 ~ /^@/ || $5 == 60' $SAM > $MAPQ60.sam

# Sorting sam files
samtools sort $MAPQ60.sam > $MAPQ60.sort.sam

# Indexing sam files
samtools view -b ${sample}.MAPQ60.sort.sam -T $REFERENCE > $MAPQ60.sort.bam
```

## 8) MinION Variant Calling

Obtention of mpileup files (5):

```
samtools mpileup -AB -d 1000000 -f $REFERENCE $sort.bam > $MPILEUP
```

To call SNPs, we execute VarScan (6) on the mpileup files with the following parameters for samples sequenced with MinION: minimum read depth = 50, minimum number of reads supporting a position = 2, minimum base quality at a position to count a read = 10, minimum variant allele frequency threshold = 0.40 and minimum frequency to call homozygote = 0.90.

```
java -Xms10G -Xmx32G -jar VarScan.v2.3.7.jar pileup2snp $MPILEUP --min-coverage 50 --min-reads2 2 --min-avg-qual 10 --min-freq-for-hom 0.90 --min-var-freq 0.40 > $SNP
```

To call Insertions/Deletions (indels) we execute VarScan (6) on the mpileup files with the following parameters for samples sequenced with MinION:

```
java -Xms10G -Xmx32G -jar VarScan.v2.3.7.jar pileup2indel $MPILEUP --min-coverage 50 --min-reads2 2 --min-avg-qual 15 --min-freq-for-hom 0.90 --min-var-freq 0.1 --p-value 99e-02 > $INDEL
```

## 9) Calibration of MinION Variant Calling

Formulas to evaluate True positive rate (TPR), true negative rate (TNR) or recall, precision, agreement, F1-score, accuracy and error rate (7,8):

$$\text{True Positive Rate} = \frac{TP}{TP + FN}$$

$$\text{True Negative Rate} = \frac{TN}{TN + FP}$$

$$\text{Precision} = \frac{TP}{TP + FP}$$

$$\% \text{ Agreement} = \frac{TP}{TP + FP + FN} \cdot 100$$

$$\text{F1 - Score} = \frac{2 \cdot (TPR \cdot \text{Precision})}{TPR + \text{Precision}}$$

$$\text{Accuracy (\%)} = \frac{TP + TN}{TP + TN + FP + FN} \cdot 100$$

$$\text{Error Rate MinION} = \frac{FP + FN}{\text{Total SNPs MinION}}$$

## SUPPLEMENTARY TABLES

**Table S1:** Primer sequences and their corresponding final concentrations for PCR

| Primer     | Sequence                | PCR Concentration (uM) |
|------------|-------------------------|------------------------|
| katG_F_1   | TGCGGCGGGTTGTGGTTGAT    | 0.1                    |
| katG_R_2   | GCGCTACGAGTCCAGGGTCCG   | 0.1                    |
| gyrA_F_1   | AGATGACAGACACGACGTTGCC  | 0.2                    |
| gyrA_R_1   | AGCCTAGCTGCCCCGATTCTT   | 0.2                    |
| inhA_F_2.1 | TTGGCGCCATGGAAGGCAGA    | 0.1                    |
| inhA_R_2.1 | TGGCTAGTCGAGCGAACCGC    | 0.1                    |
| gyrB_F_4   | TGCGGTTGGCGGCCTATCAA    | 0.2                    |
| gyrB_R_1   | CGCAGGGTTGCGTTAGACATCC  | 0.2                    |
| pncA_F_1   | ATCCGGACACTTGCCACCCG    | 0.2                    |
| pncA_R_1   | GTTGGCGTTGCGTTGGGTCC    | 0.2                    |
| rpoB_F_int | GTCGCATGAAGTGCTGGAAGG   | 0.3                    |
| rpoB_R_int | GAAGTTGACGTCGAGCACGTAAC | 0.3                    |
| embB_F_1   | CCAGACGCCGTTGTCGAGGA    | 0.6                    |
| embB_R_2   | GGCCTGGTGCATACCGAGCA    | 0.6                    |
| eis_F_1    | AGGGTGACGAGTCCTGGGGT    | 0.2                    |
| eis_R_1    | GAAGCGATGAGGTGGGGGCA    | 0.2                    |
| rrs_F_1    | ACGAGCGTCCGAAGGCTGTC    | 0.2                    |
| rrs_R_2    | GCCATCACCACCCTCCTCCG    | 0.2                    |
| L125_F_3   | ACCCGCACTATGCCTGGCTG    | 0.4                    |
| L125_R_3   | TGGATGGCGCTCAACGGGAG    | 0.4                    |
| L346_F_1   | TCCCGACGGTGCCTGACTTG    | 0.4                    |
| L346_R_3   | CGGCAGTGCCAGTTCATGCC    | 0.4                    |



|      |                      |                                        |
|------|----------------------|----------------------------------------|
| BC14 | Barcode_1609_1571_Fw | ACGATCTATCCAGTGCTGCGACTACGTGACGATCTAT  |
|      | Barcode_1609_1571_Rv | TAGATCGTCACGTAGTCGCAGCACTGGATAGATCGT   |
| BC15 | Barcode_1696_1697_Fw | ACGATCTAGATTCGGCACA CTCTCGCACACGATCTAT |
|      | Barcode_1696_1697_Rv | TAGATCGTGTGCGAGAGTGTGCCGAATCTAGATCGT   |
| BC16 | Barcode_1723_1789_Fw | ACGATCTACAATCCAGGCATCCAGAGCCACGATCTAT  |
|      | Barcode_1723_1789_Rv | TAGATCGTGGCTCTGGATGCCTGGATTGTAGATCGT   |
| BC17 | Barcode_1835_1863_Fw | ACGATCTAATAGAAGTCCTTATGTCTCCACGATCTAT  |
|      | Barcode_1835_1863_Rv | TAGATCGTGGAGACATAAGGACTTCTATTAGATCGT   |
| BC18 | Barcode_1946_1947_Fw | ACGATCTACGAGTAGTTCAAGGTAGTTCACGATCTAT  |
|      | Barcode_1946_1947_Rv | TAGATCGTGA ACTACCTTGA ACTACTCGTAGATCGT |
| BC19 | Barcode_2081_2107_Fw | ACGATCTACGCACACGTTCCGCTTGCTTACGATCTAT  |
|      | Barcode_2081_2107_Rv | TAGATCGTAAGCAAGCGGAACGTGTGCGTAGATCGT   |
| BC20 | Barcode_1975_1976_Fw | ACGATCTAAGCGTTACATTTGACAGCATACGATCTAT  |
|      | Barcode_1975_1976_Rv | TAGATCGTATGCTGTCAAATGTAACGCTTAGATCGT   |

**Table S3:** Phylogenetic determining variants

| Lineage | SNP        |
|---------|------------|
| 1       | 4357773 GA |
| 2       | 4357804 TG |
| 3       | 1281984 GA |
| 4       | 1281771 CT |
| 5       | 4357657 GA |
| 6       | 1281685 CG |

**Table S4:** Percentage of agreement between Illumina and MinION SNPs at different variant calls in MinION and 0.1 frequency in Illumina

| Frequency in MinION | TP  | FP   | FN | TN     | TPR       | TNR      |
|---------------------|-----|------|----|--------|-----------|----------|
| 0.1                 | 140 | 1478 | 5  | 478244 | 0.9655172 | 0.996919 |

|            |            |          |           |               |                  |                  |
|------------|------------|----------|-----------|---------------|------------------|------------------|
| 0.2        | 134        | 93       | 11        | 479582        | 0.9241379        | 0.9998061        |
| 0.3        | 132        | 13       | 14        | 479654        | 0.9041096        | 0.9999729        |
| <b>0.4</b> | <b>132</b> | <b>3</b> | <b>14</b> | <b>479664</b> | <b>0.9041096</b> | <b>0.9999937</b> |
| 0.5        | 131        | 2        | 15        | 479665        | 0.8972603        | 0.9999958        |
| 0.6        | 130        | 2        | 16        | 479665        | 0.890411         | 0.9999958        |
| 0.7        | 129        | 2        | 17        | 479665        | 0.8835616        | 0.9999958        |
| 0.8        | 125        | 2        | 21        | 479665        | 0.8561644        | 0.9999958        |
| 0.9        | 115        | 2        | 31        | 479664        | 0.7876712        | 0.9999958        |

**Abbreviations:** TP, true positive variants; FN, false negative variants; FP, false positive variants; TN: true negative variants; TPR: true positive rate; TNR: true negative rate.



**Table S5:** Resistance profile and phylogenetic classification of samples

| Sample     | Antibiotic |     |    |     |     |     |     | Lineage | Agreement          |         |
|------------|------------|-----|----|-----|-----|-----|-----|---------|--------------------|---------|
|            | FQ         | RMP | SM | INH | PZA | KAN | EMB |         | Resistance Profile | Lineage |
| N0067_L1   | S          | S   | S  | S   | S   | S   | S   | L1      | 100                | 100     |
| G981_L2    | S          | S   | S  | S   | S   | S   | S   | L2      | 100                | 100     |
| G107_L3    | S          | S   | S  | S   | S   | S   | S   | L3      | 100                | 100     |
| G770_L4    | S          | S   | S  | S   | S   | S   | S   | L4      | 100                | 100     |
| G1961_L5   | S          | R   | S  | S   | S   | S   | R   | L5      | 100                | 100     |
| G1952_L6   | S          | S   | S  | S   | S   | S   | S   | L6      | 100                | 100     |
| G870       | R          | R   | S  | R   | S   | R   | R   | L2      | 100                | 100     |
| G841       | S          | R   | S  | S   | S   | S   | S   | L4      | 100                | 100     |
| G1800      | R          | R   | S  | R   | S   | R   | R   | L2      | 100                | 100     |
| 182320_M20 | S          | S   | S  | S   | S   | S   | S   | L4      | 100                | 100     |
| G1646_W19  | S          | S   | S  | S   | S   | S   | S   | L4      | 100                | 100     |
| G2267_W20  | S          | S   | S  | S   | S   | S   | S   | L4      | 100                | 100     |
| G2103_W23  | S          | S   | S  | S   | S   | S   | S   | L4      | 100                | 100     |
| G2284_W26  | S          | S   | S  | S   | S   | S   | S   | L4      | 100                | 100     |
| G1335_W27  | S          | S   | S  | S   | S   | S   | S   | L2      | 100                | 100     |

**Abbreviations:** FQ, fluoroquinolones; RMP, rifampicin; SM, streptomycin; INH, isoniazid; PZA, pyrazinamide; KAN, kanamycin; EMB, ethambutol; L, lineage; S, susceptible; R, resistant.

**Table S6:** Sequences of reverse primers for the qPCR of the PCR product

| Primer              | Sequence               |
|---------------------|------------------------|
| <b>katG_Rv_qPCR</b> | CGTGGACCTGGTCTTCGGGTC  |
| <b>gyrA_Rv_qPCR</b> | GGCGGAAGCCGGAATCGAAC   |
| <b>inhA_Rv_qPCR</b> | GCCCTGGCTGCGGGTGTATT   |
| <b>pncA_Rv_qPCR</b> | GGGTGTGCTGCCGATGACGA   |
| <b>gyrB_Rv_qPCR</b> | ATCGATGTGCACCCGCCTGG   |
| <b>embB_Rv_qPCR</b> | CAATCAGCCC GGCGATGGTG  |
| <b>rpoB_Rv_qPCR</b> | GGTCTGGACGTCAAGGAGTCCC |
| <b>L125_Rv_qPCR</b> | CACCCCGGTGATCCACAGCA   |
| <b>L346_Rv_qPCR</b> | GCGCCACGCCGACATATTCC   |
| <b>eis_Rv_qPCR</b>  | TCGCGGTGCTGGTGACGG     |

|             |                      |
|-------------|----------------------|
| rrs_Rv_qPCR | GTCCGAGCGTCTGCACCGAG |
|-------------|----------------------|

**Table S7:** ROC analysis of vSNPs in MinION (Illumina frequency  $\geq 0.1$ )

| Freq Minion | TP  | FP  | FN | TN     | TPR/Recall | TNR       | Sample Type | Agreement   |
|-------------|-----|-----|----|--------|------------|-----------|-------------|-------------|
| 0.1         | 39  | 776 | 0  | 150696 | 1          | 0.9948769 | Sputum      | 4.785276074 |
| 0.2         | 36  | 48  | 3  | 151408 | 0.9230769  | 0.9996831 | Sputum      | 42.85714286 |
| 0.3         | 35  | 4   | 4  | 151449 | 0.8974359  | 0.9999736 | Sputum      | 89.74358974 |
| 0.4         | 35  | 3   | 4  | 151450 | 0.8974359  | 0.9999802 | Sputum      | 92.10526316 |
| 0.5         | 35  | 2   | 4  | 151451 | 0.8974359  | 0.9999868 | Sputum      | 94.59459459 |
| 0.6         | 35  | 2   | 4  | 151451 | 0.8974359  | 0.9999868 | Sputum      | 94.59459459 |
| 0.7         | 35  | 2   | 4  | 151451 | 0.8974359  | 0.9999868 | Sputum      | 94.59459459 |
| 0.8         | 35  | 2   | 4  | 151451 | 0.8974359  | 0.9999868 | Sputum      | 94.59459459 |
| 0.9         | 33  | 2   | 6  | 151451 | 0.8461538  | 0.9999868 | Sputum      | 94.28571429 |
| 0.1         | 101 | 702 | 5  | 327548 | 0.9528302  | 0.9978614 | Culture     | 12.57783313 |
| 0.2         | 98  | 45  | 8  | 328174 | 0.9245283  | 0.9998629 | Culture     | 68.53146853 |
| 0.3         | 97  | 9   | 10 | 328205 | 0.9065421  | 0.9999726 | Culture     | 91.50943396 |
| 0.4         | 97  | 0   | 10 | 328214 | 0.9065421  | 1         | Culture     | 100         |
| 0.5         | 96  | 0   | 11 | 328214 | 0.8971963  | 1         | Culture     | 100         |
| 0.6         | 95  | 0   | 12 | 328214 | 0.8878505  | 1         | Culture     | 100         |
| 0.7         | 94  | 0   | 13 | 328214 | 0.8785047  | 1         | Culture     | 100         |
| 0.8         | 90  | 0   | 17 | 328214 | 0.8411215  | 1         | Culture     | 100         |
| 0.9         | 82  | 0   | 25 | 328213 | 0.7663551  | 1         | Culture     | 100         |

**Abbreviations:** TP, true positive variants; FN, false negative variants; FP, false positive variants; TN: true negative variants; TPR: true positive rate; TNR: true negative rate.

**Table S8:** ROC analysis of fSNPs in MinION (Illumina frequency  $\geq 0.9$ )

| Freq Minion | TP | FP | FN | TN     | TPR/Recall | TNR       | Sample Type | Agreement   |
|-------------|----|----|----|--------|------------|-----------|-------------|-------------|
| 0.3         | 35 | 4  | 0  | 151452 | 1          | 0.9999736 | Sputum      | 89.74358974 |
| 0.4         | 35 | 3  | 0  | 151453 | 1          | 0.9999802 | Sputum      | 92.10526316 |
| 0.5         | 35 | 2  | 0  | 151454 | 1          | 0.9999868 | Sputum      | 94.59459459 |
| 0.6         | 35 | 2  | 0  | 151454 | 1          | 0.9999868 | Sputum      | 94.59459459 |
| 0.7         | 35 | 2  | 0  | 151454 | 1          | 0.9999868 | Sputum      | 94.59459459 |
| 0.8         | 35 | 2  | 0  | 151454 | 1          | 0.9999868 | Sputum      | 94.59459459 |
| 0.9         | 33 | 2  | 2  | 151454 | 0.9428571  | 0.9999868 | Sputum      | 94.28571429 |
| 0.3         | 94 | 12 | 0  | 328214 | 1          | 0.9999634 | Culture     | 88.67924528 |
| 0.4         | 94 | 3  | 0  | 328223 | 1          | 0.9999909 | Culture     | 96.90721649 |
| 0.5         | 94 | 2  | 0  | 328224 | 1          | 0.9999939 | Culture     | 97.91666667 |
| 0.6         | 94 | 1  | 0  | 328225 | 1          | 0.999997  | Culture     | 98.94736842 |
| 0.7         | 94 | 0  | 0  | 328226 | 1          | 1         | Culture     | 100         |
| 0.8         | 90 | 0  | 4  | 328226 | 0.9574468  | 1         | Culture     | 100         |
| 0.9         | 82 | 0  | 12 | 328225 | 0.8723404  | 1         | Culture     | 100         |

**Abbreviations:** TP, true positive variants; FN, false negative variants; FP, false positive variants; TN: true negative variants; TPR: true positive rate; TNR: true negative rate.

**Table S9:** Recall/TNR of drug-resistance and lineage prediction by gene

| Prediction                            | FQ                 |                    | RMP                  | SM                 | INH                |                    | PZA                | KAN                | EMB                | L125                   | L346                | Median             |
|---------------------------------------|--------------------|--------------------|----------------------|--------------------|--------------------|--------------------|--------------------|--------------------|--------------------|------------------------|---------------------|--------------------|
| Gene                                  | <i>gyrB</i>        | <i>gyrA</i>        | <i>rpoB</i>          | <i>rrs</i>         | <i>inhA</i>        | <i>katG</i>        | <i>pncA</i>        | <i>eis</i>         | <i>embB</i>        |                        |                     |                    |
| <b>Total SNPs</b>                     | 45675              | 38115              | 46330                | 38867              | 41445              | 37110              | 46138              | 44989              | 51330              | 42355                  | 47460               | 44989              |
| <b>TP</b>                             | 11                 | 21                 | 16                   | 3                  | 5                  | 11                 | 9                  | 5                  | 19                 | 23                     | 9                   | 11                 |
| <b>TN</b>                             | 45664              | 38094              | 46310                | 38863              | 41440              | 37099              | 46129              | 44983              | 51311              | 42316                  | 47448               | 44983              |
| <b>FP</b>                             | 0                  | 0                  | 0                    | 1                  | 0                  | 0                  | 0                  | 1                  | 0                  | 4                      | 0                   | 0                  |
| <b>FN</b>                             | 0                  | 0                  | 4                    | 0                  | 0                  | 0                  | 0                  | 0                  | 0                  | 12                     | 3                   | 0                  |
| <b>Recall all SNPs (95% CI)</b>       | 1<br>(0.72-1)      | 1<br>(0.84-1)      | 0.8<br>(0.56-0.94)   | 1<br>(0.29-1)      | 1<br>(0.48-1)      | 1<br>(0.72-1)      | 1<br>(0.66-1)      | 1<br>(0.78-1)      | 1<br>(0.82-1)      | 0.66<br>(0.48-0.81)    | 0.75<br>(0.43-0.95) | 1 (0.72-1)         |
| <b>TNR all SNPs (95% CI)</b>          | 1<br>(0.99-1)      | 1<br>(0.99-1)      | 1<br>(0.99-1)        | 0.99<br>(0.99-1)   | 1<br>(0.99-1)      | 1<br>(0.99-1)      | 1<br>(0.99-1)      | 0.99<br>(0.99-1)   | 1<br>(0.99-1)      | 0.99<br>(0.98-1)       | 1<br>(0.99-1)       | 1 (0.99-1)         |
| <b>Agreement all SNPs (%)</b>         | 100                | 100                | 80                   | 75                 | 100                | 100                | 100                | 83.33              | 100                | 58.97                  | 75                  | 100                |
| <b>Accuracy all SNPs (%) (95% CI)</b> | 100<br>(99.99-100) | 100<br>(99.99-100) | 99.99<br>(99.99-100) | 100<br>(99.99-100) | 100<br>(99.99-100) | 100<br>(99.99-100) | 100<br>(99.99-100) | 100<br>(99.99-100) | 100<br>(99.99-100) | 99.96<br>(99.94-99.98) | 99.99<br>(99.98-1)  | 100<br>(99.99-100) |
| <b>Sensitivity DR SNPs (95% CI)</b>   | 1<br>(0.025-1)     | 1<br>(0.025-1)     | 1<br>(0.40-1)        | No DR SNPs found   | No DR SNPs found   | 1<br>(0.16-1)      | 1<br>(0.025-1)     | 1<br>(0.16-1)      | 1<br>(0.29-1)      | 1<br>(0.54-1)          | 1<br>(0.66-1)       | 1 (0.16-1)         |
| <b>Specificity DR SNPs (95% CI)</b>   | 1<br>(0.98-1)      | 1<br>(0.97-1)      | 1<br>(0.99-1)        | 1<br>(0.97-1)      | 1<br>(0.88-1)      | 1<br>(0.97-1)      | 1<br>(0.99-1)      | 1<br>(0.94-1)      | 1<br>(0.99-1)      | 1<br>(0.91-1)          | 1<br>(0.90-1)       | 1 (0.97-1)         |
| <b>Agreement DR SNPs (%)</b>          | 100                | 100                | 100                  | 100                | 100                | 100                | 100                | 100                | 100                | 100                    | 100                 | 100                |
| <b>Accuracy DR SNPs (%) (95% CI)</b>  | 100<br>(98.13-100) | 100<br>(96.55-100) | 100<br>(98.89-100)   | NA                 | NA                 | 100<br>(97.30-100) | 100<br>(99.84-100) | 100<br>(94.04-100) | 100<br>(98.84-100) | 100<br>(92.13-100)     | 100<br>(92.13-100)  | 100 (97-100)       |

**Abbreviations:** FQ, fluoroquinolones; RMP, rifampicin; SM, streptomycin; INH, isoniazid; PZA, pyrazinamide; KAN, kanamycin; EMB, ethambutol; L125 and L346, regions containing phylogenetic determining SNPs; CI: confidence intervals; TNP: true negative rate.

## SUPPLEMENTARY FIGURES:

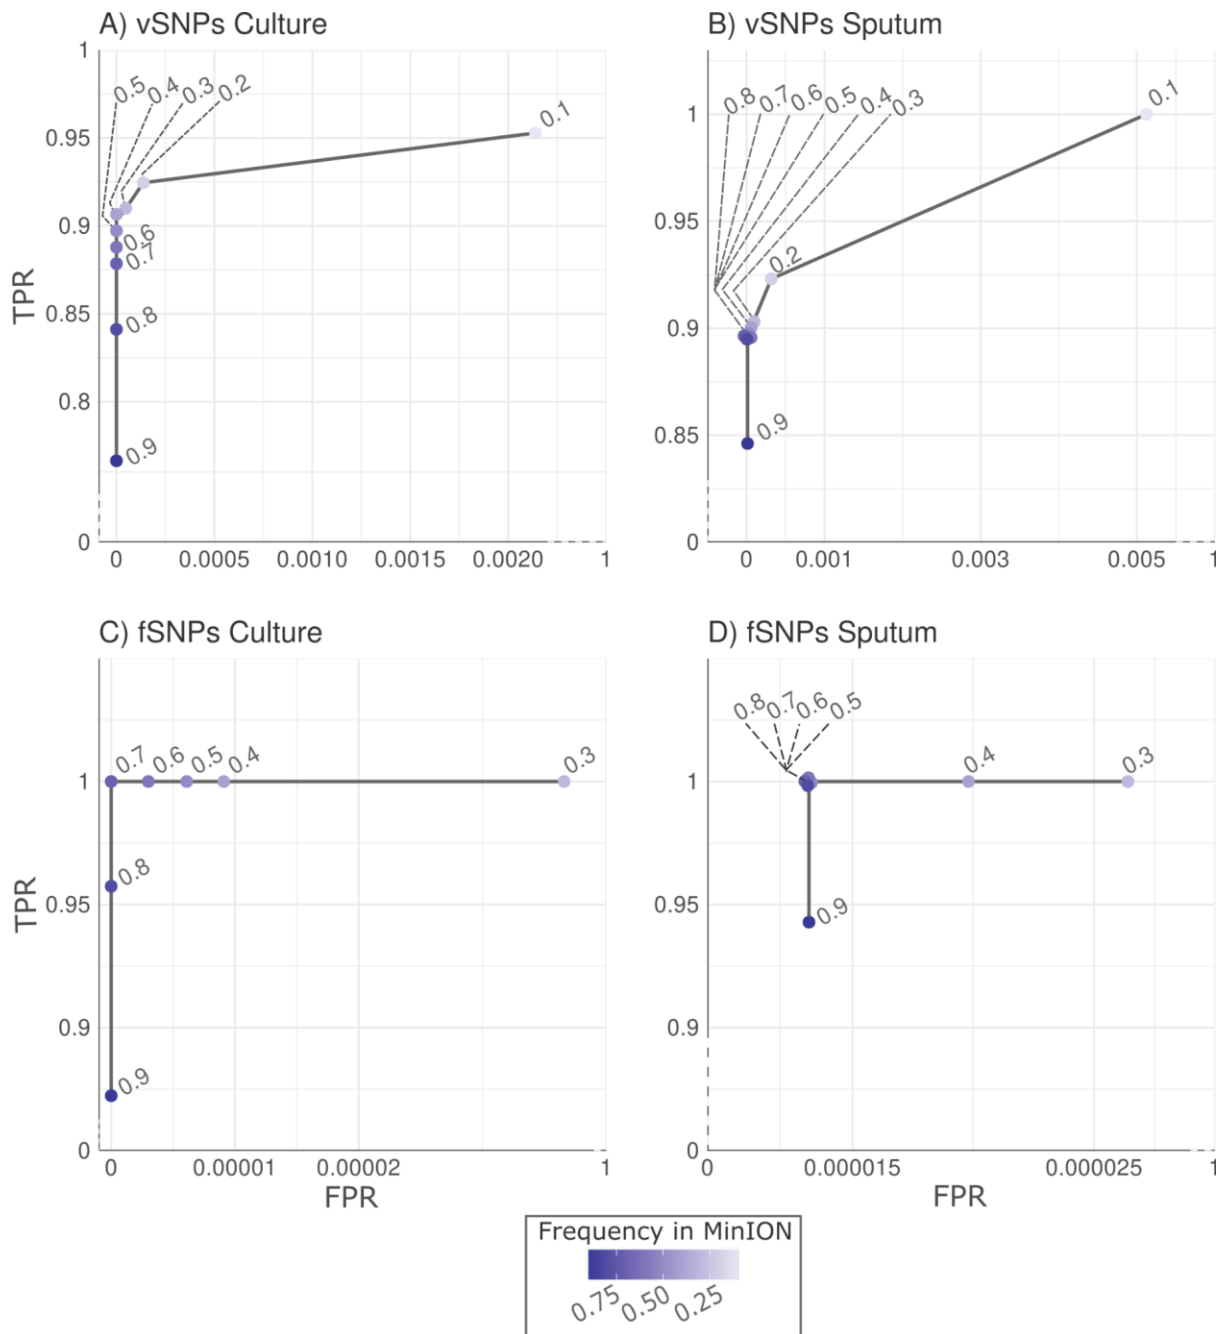

**Figure S1:** ROC curve used to set the frequency threshold employed to call variants in MinION. Points represent the values for recall and false positive rate obtained when applying different frequency values in MinION variant calling. Both axes are truncated. **A-B)** ROC curve used to set the frequency threshold to call variable SNPs in MinION. Recall and false positive rate value obtained using different variant calling frequency cut-offs for MinION (from 0.1 to 0.9 using increments of 0.1) and comparing with Illumina variant calls at a 0.1 fixed threshold. **C-D)** ROC curve used to determine the frequency threshold to call fixed SNPs in MinION. Both axes are truncated. Recall and false positive rate value obtained using different variant calling frequency cut-offs for MinION (from 0.3 to 0.9 using increments of 0.1) and comparing with

Illumina variant calls at a 0.9 fixed threshold. A and C represent the analysis made in culture samples, and B and D represent sputum samples.

## SUPPLEMENTARY REFERENCES

1. Buschmann T. DNABarcodes: an R package for the systematic construction of DNA sample tags. *Bioinformatics* [Internet]. 2017;btw759. Available from: <http://dx.doi.org/10.1093/bioinformatics/btw759>
2. Wick RR, Judd LM, Holt KE. Performance of neural network basecalling tools for Oxford Nanopore sequencing. *Genome Biol* [Internet]. 2019 Jun 24;20(1):129. Available from: <http://dx.doi.org/10.1186/s13059-019-1727-y>
3. Comas I, Chakravarti J, Small PM, Galagan J, Niemann S, Kremer K, et al. Human T cell epitopes of *Mycobacterium tuberculosis* are evolutionarily hyperconserved [Internet]. Vol. 42, *Nature Genetics*. 2010. p. 498–503. Available from: <http://dx.doi.org/10.1038/ng.590>
4. Li H. Minimap2: pairwise alignment for nucleotide sequences. *Bioinformatics* [Internet]. 2018 Sep 15;34(18):3094–100. Available from: <http://dx.doi.org/10.1093/bioinformatics/bty191>
5. Li H, Handsaker B, Wysoker A, Fennell T, Ruan J, Homer N, et al. The Sequence Alignment/Map format and SAMtools. *Bioinformatics* [Internet]. 2009 Aug 15;25(16):2078–9. Available from: <http://dx.doi.org/10.1093/bioinformatics/btp352>
6. Koboldt DC, Zhang Q, Larson DE, Shen D, McLellan MD, Lin L, et al. VarScan 2: somatic mutation and copy number alteration discovery in cancer by exome sequencing. *Genome Res* [Internet]. 2012 Mar;22(3):568–76. Available from: <http://dx.doi.org/10.1101/gr.129684.111>
7. Lalkhen AG, McCluskey A. Clinical tests: sensitivity and specificity. *Contin Educ Anaesth Crit Care Pain* [Internet]. 2008 Dec 1 [cited 2021 May 24];8(6):221–3. Available from: <https://academic.oup.com/bjaed/article-pdf/8/6/221/1134124/mkn041.pdf>
8. Bainomugisa A, Duarte T, Lavu E, Pandey S, Coulter C, Marais BJ, et al. A complete high-quality MinION nanopore assembly of an extensively drug-resistant *Mycobacterium tuberculosis* Beijing lineage strain identifies novel variation in repetitive PE/PPE gene regions. *Microb Genom* [Internet]. 2018 Jul;4(7). Available from: <http://dx.doi.org/10.1099/mgen.0.000188>
